# Supplementary figures and images for: The Synergistic Inhibition of Coronavirus Replication and Induced Cytokine Production by Ciclesonide and the Tylophorine-Based Compound Dbq33b
Source: MDPI journal article supplement (doi:10.3390/pharmaceutics14071511), 2022-07-21

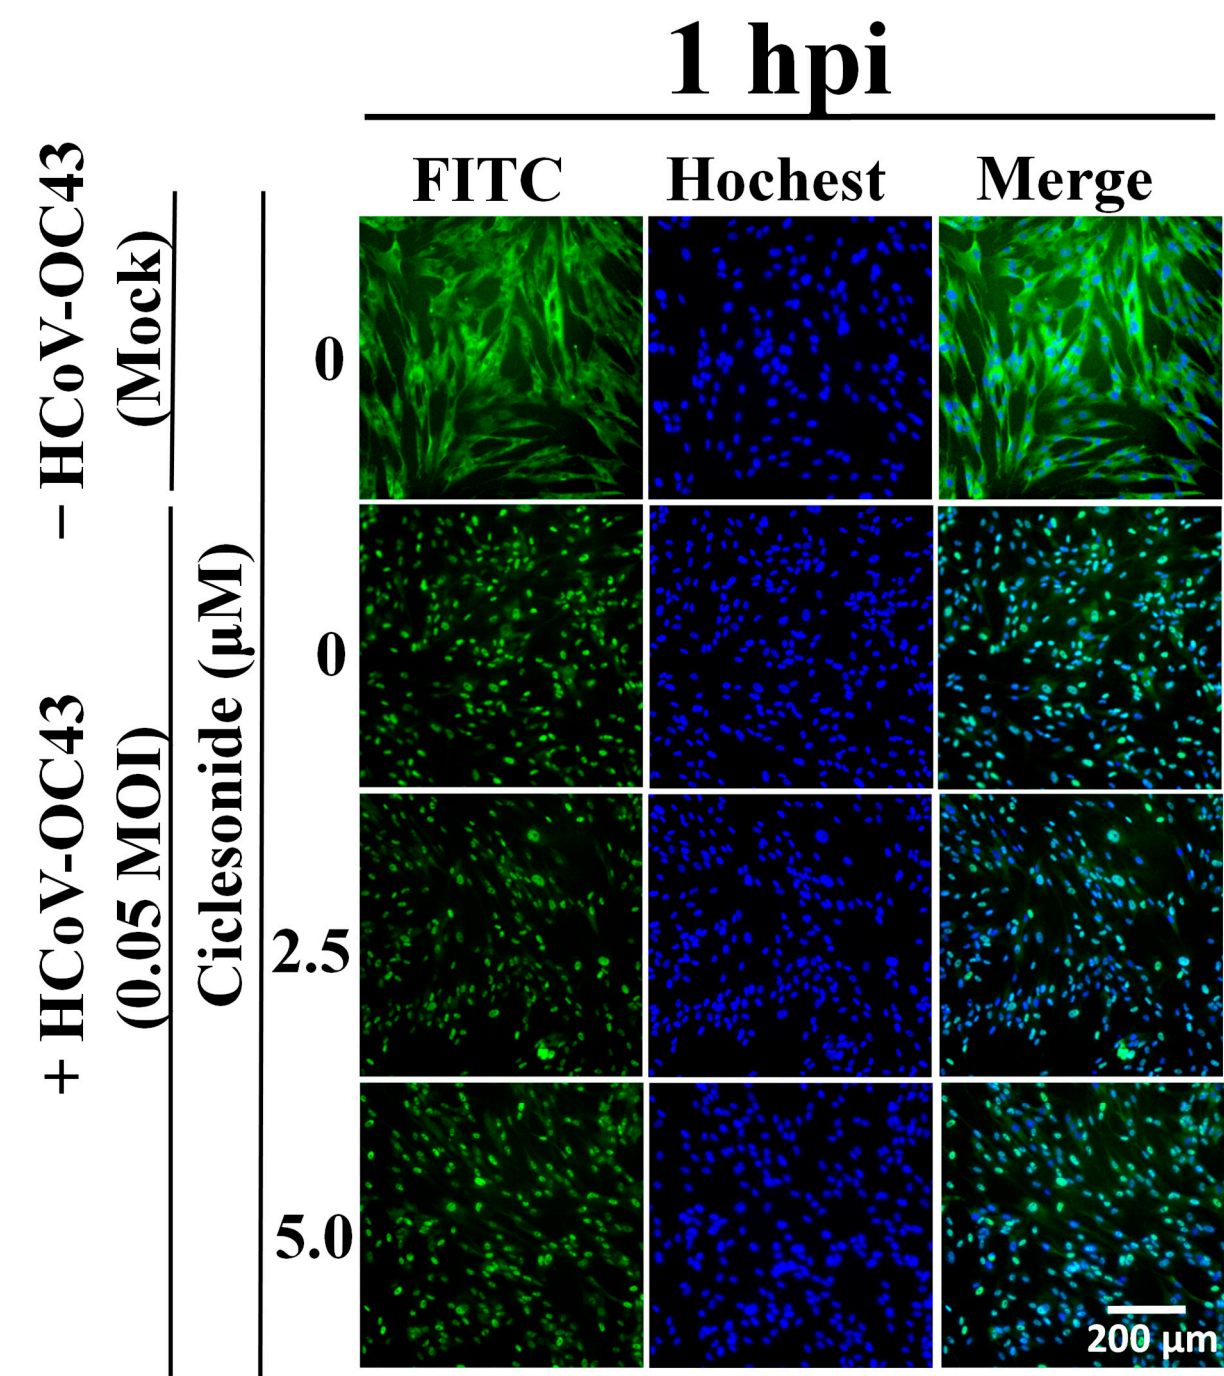

From Figure 3 B.

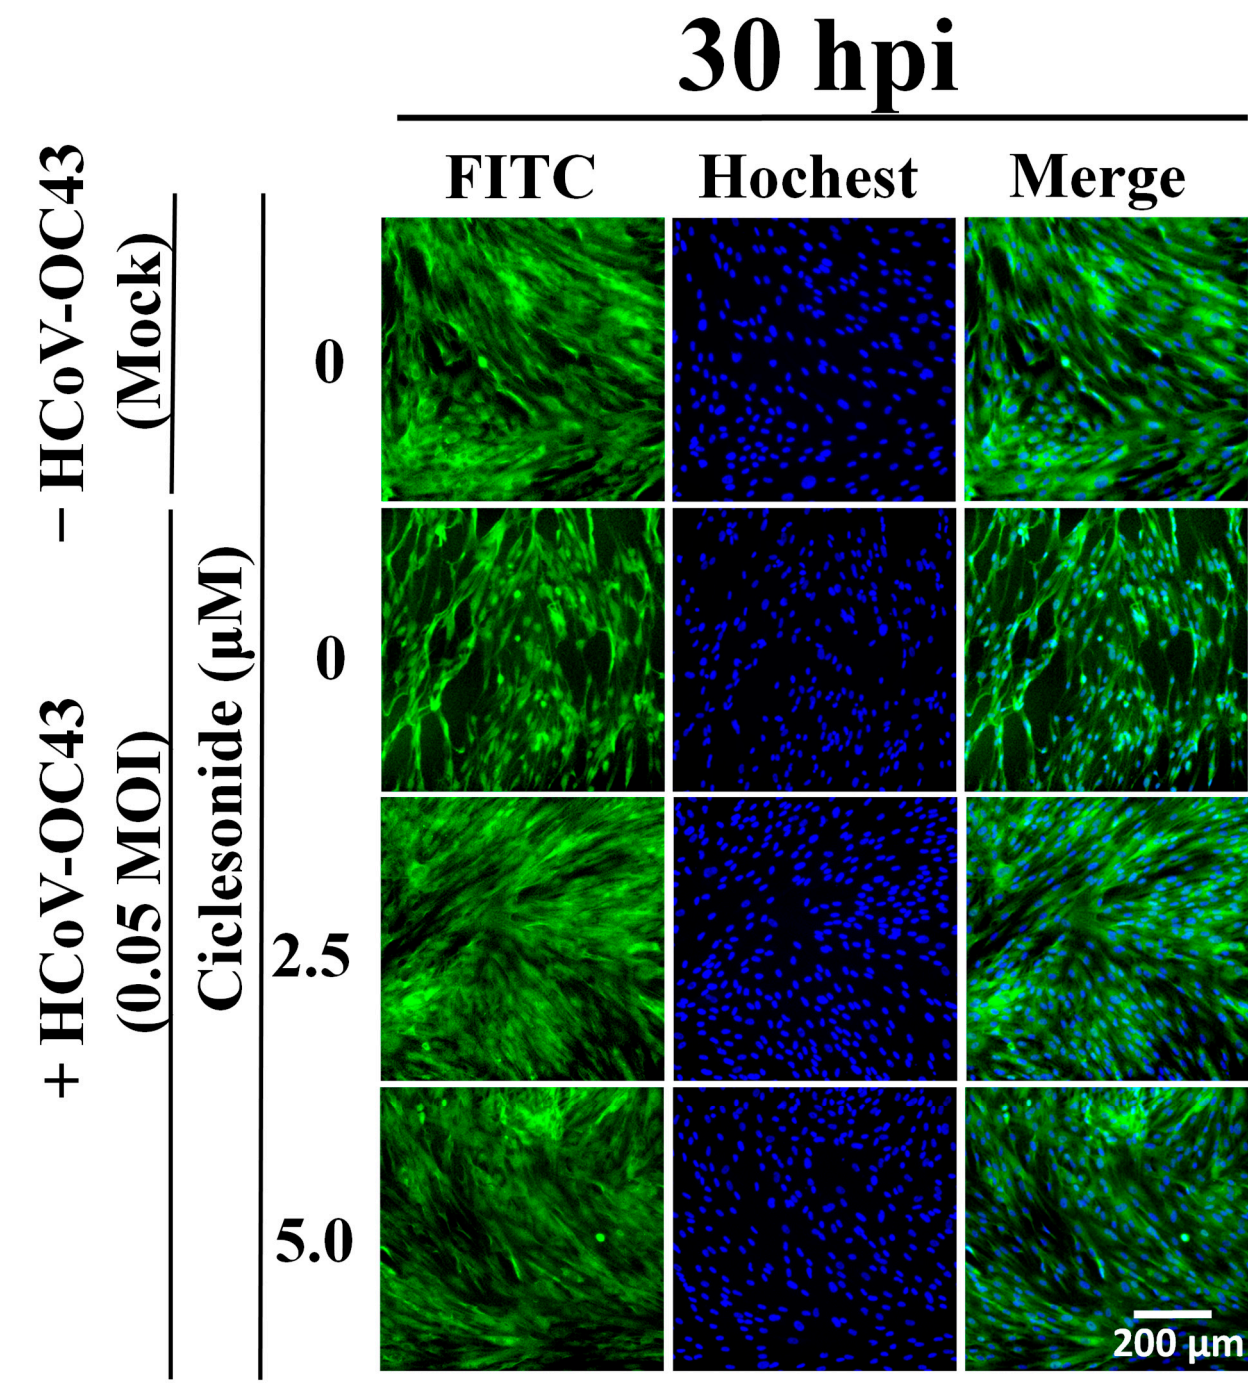

From Figure 3 C.

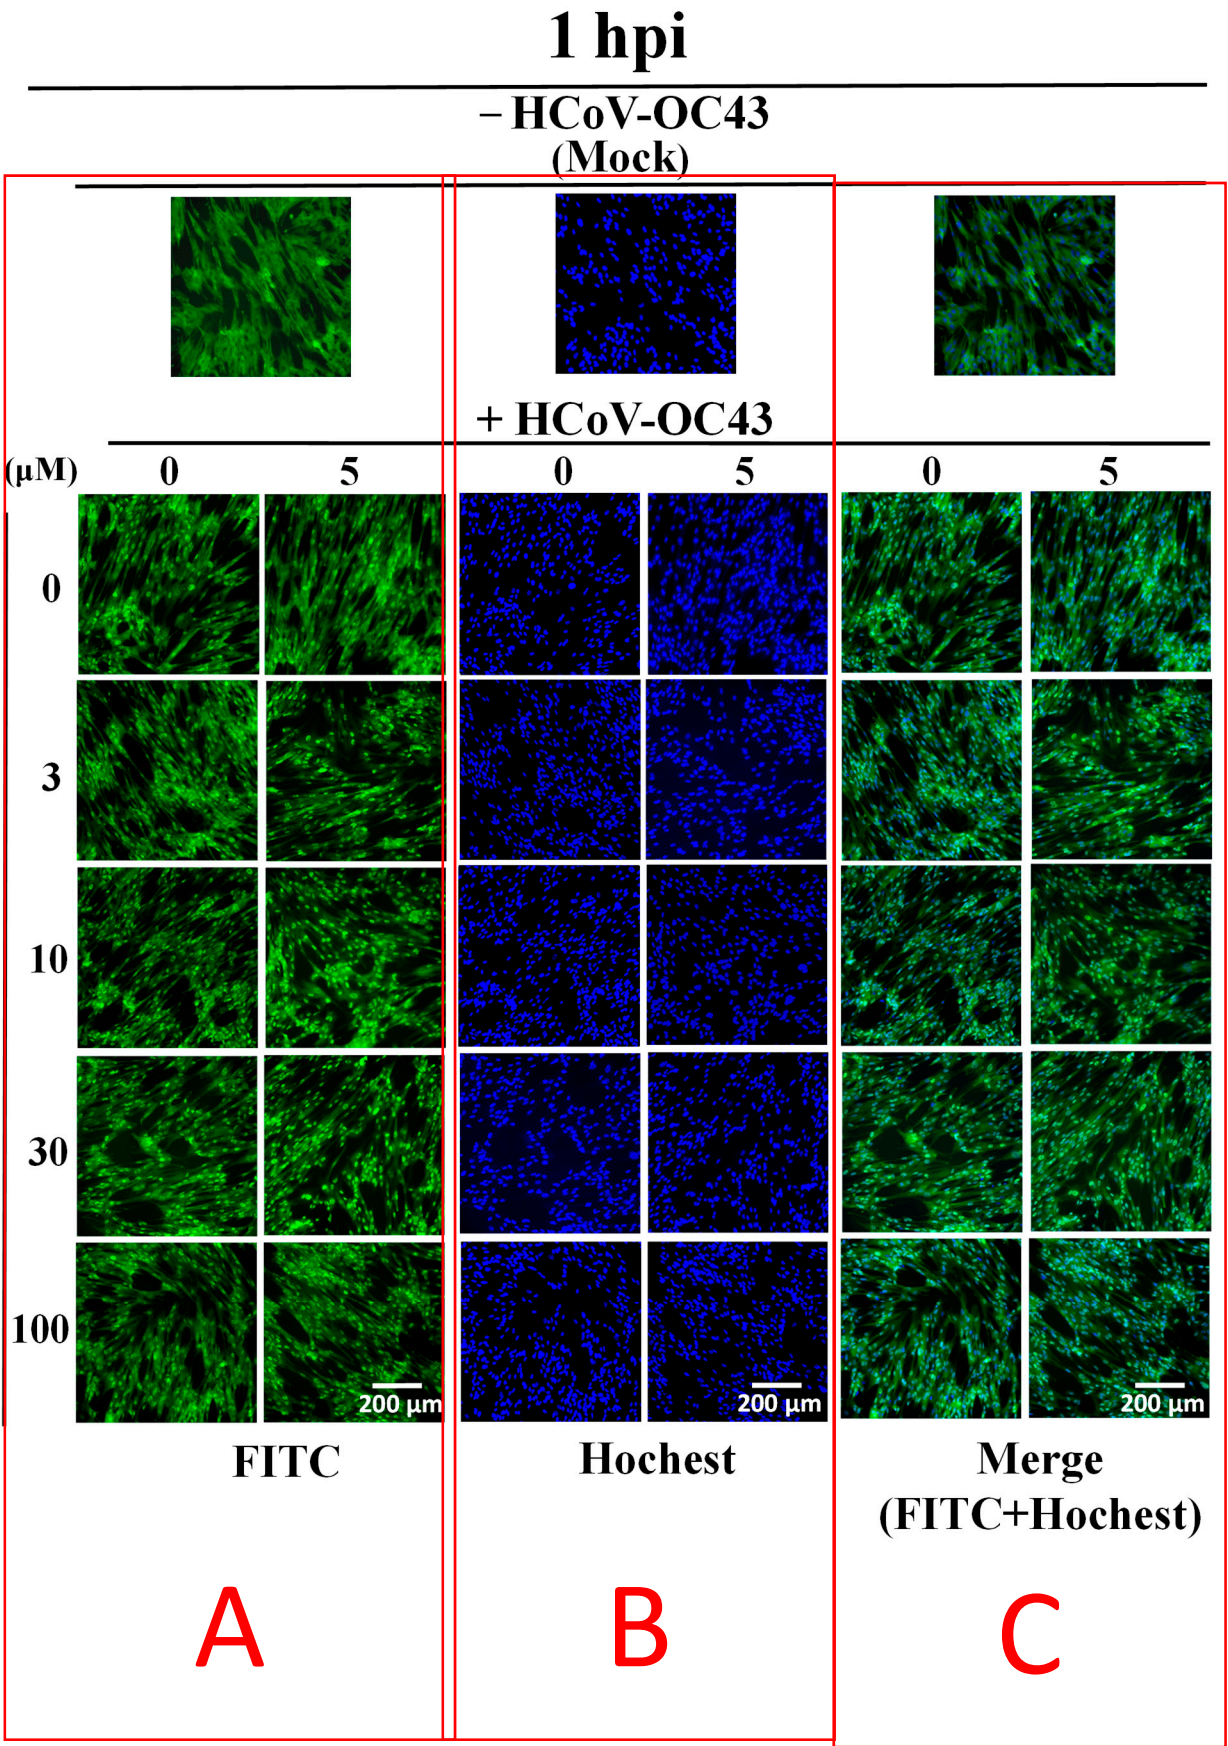



From Figure 3 C.

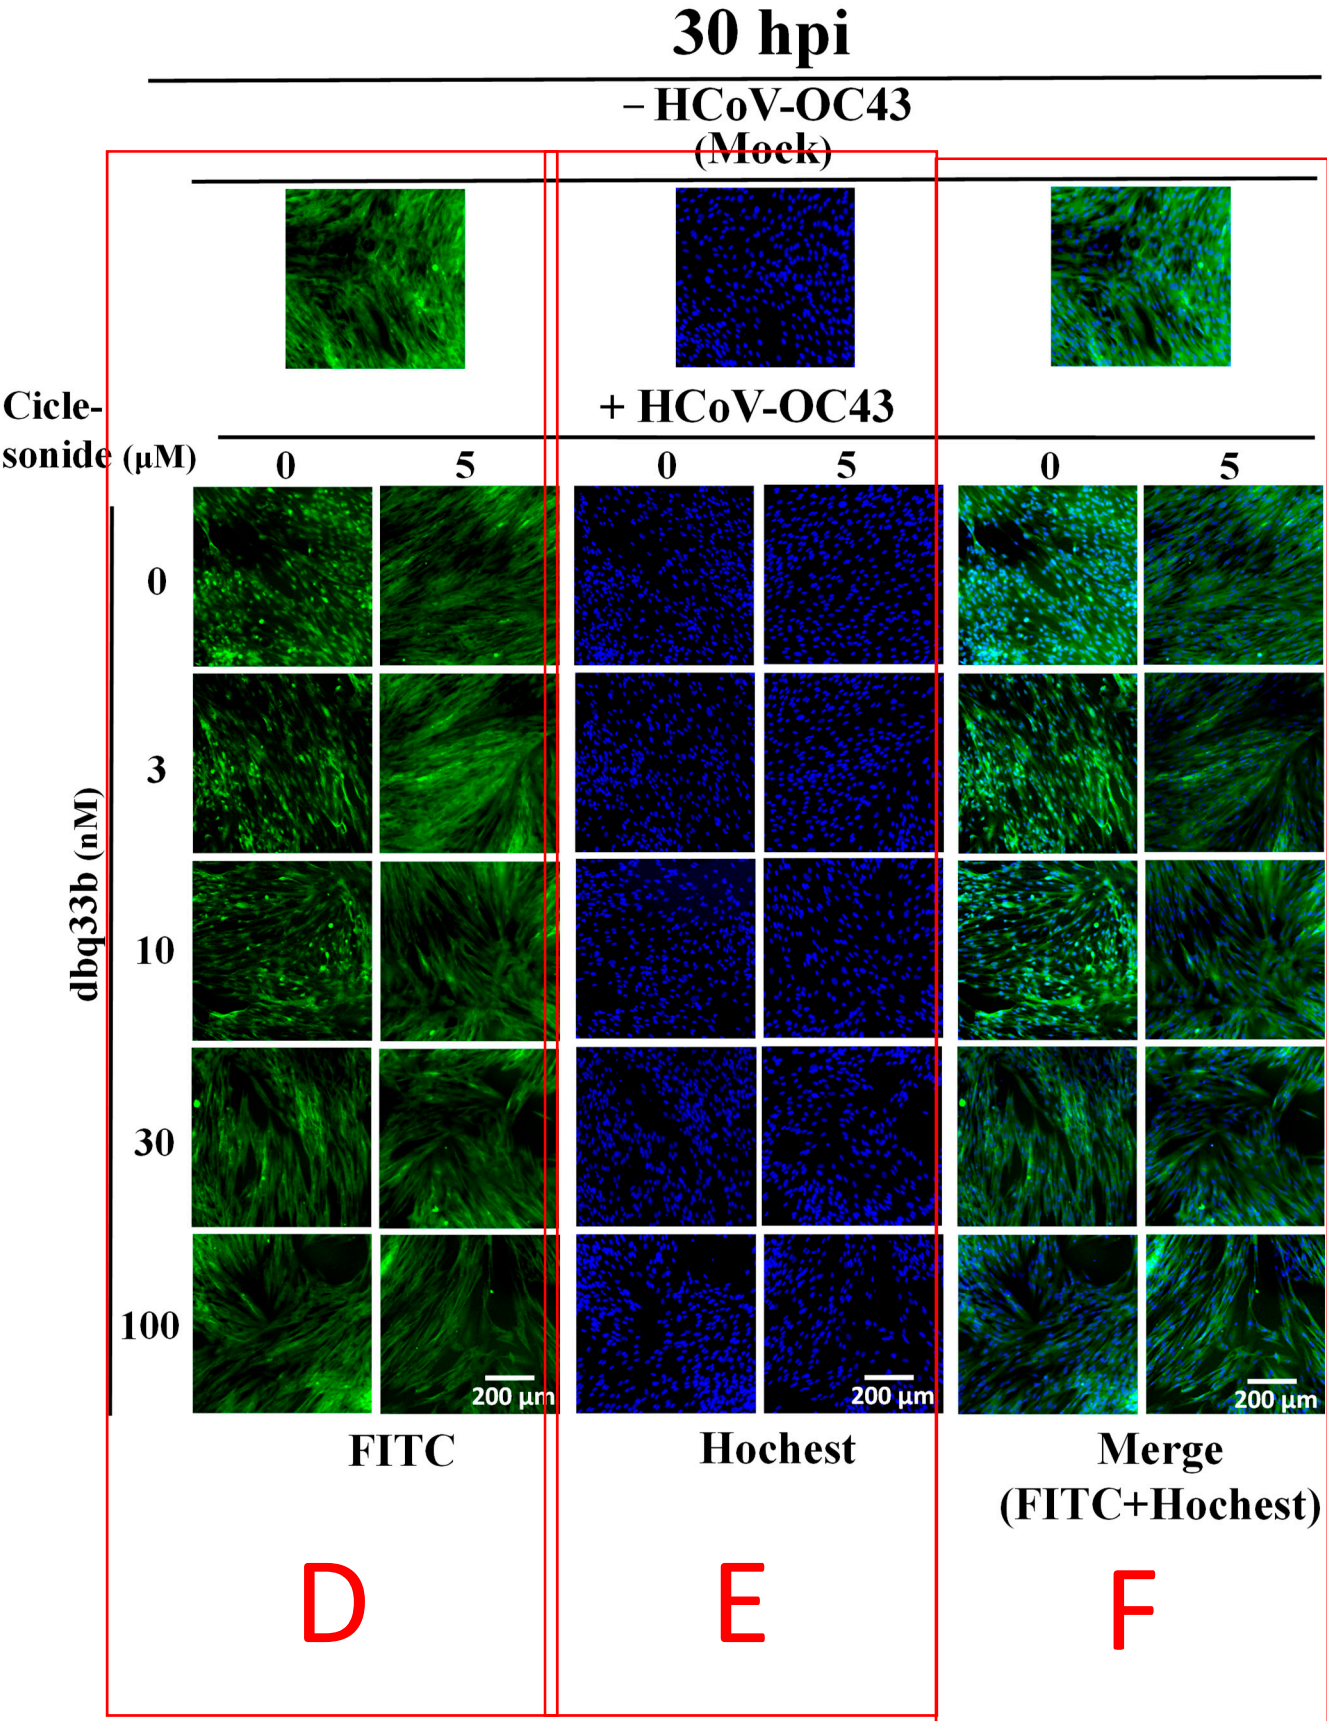



From **A**

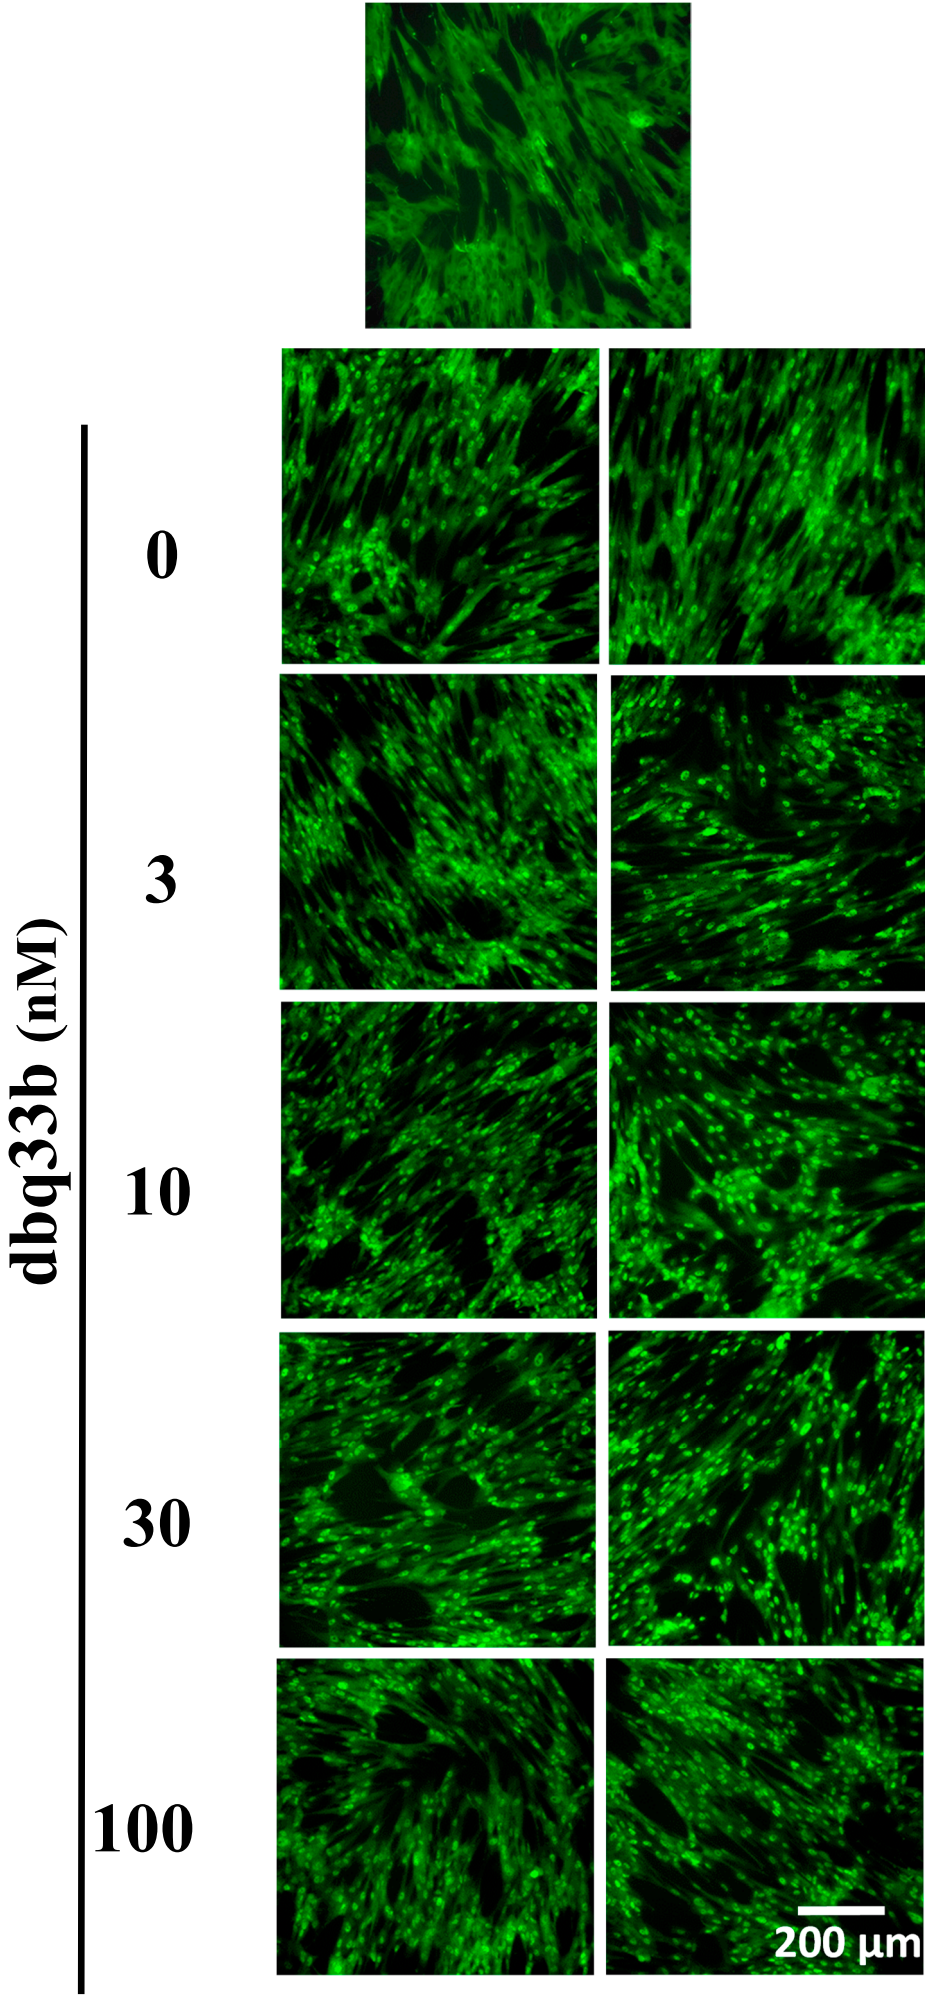

From **B**

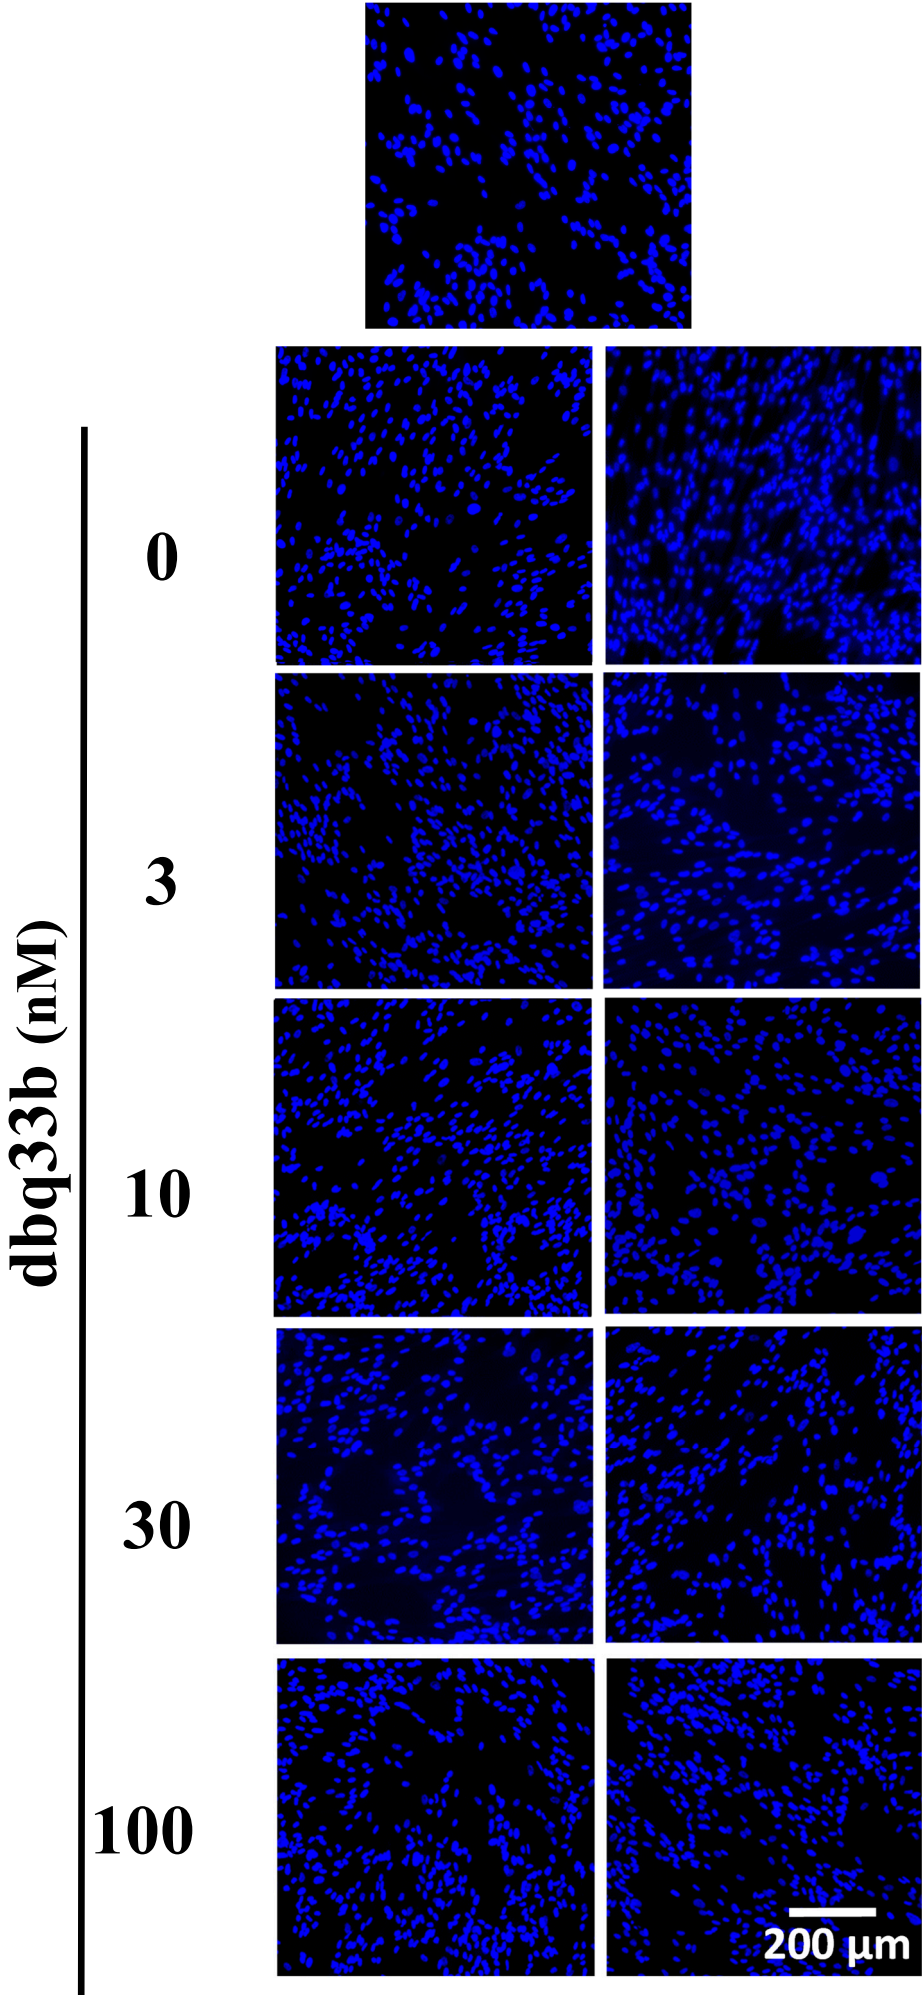

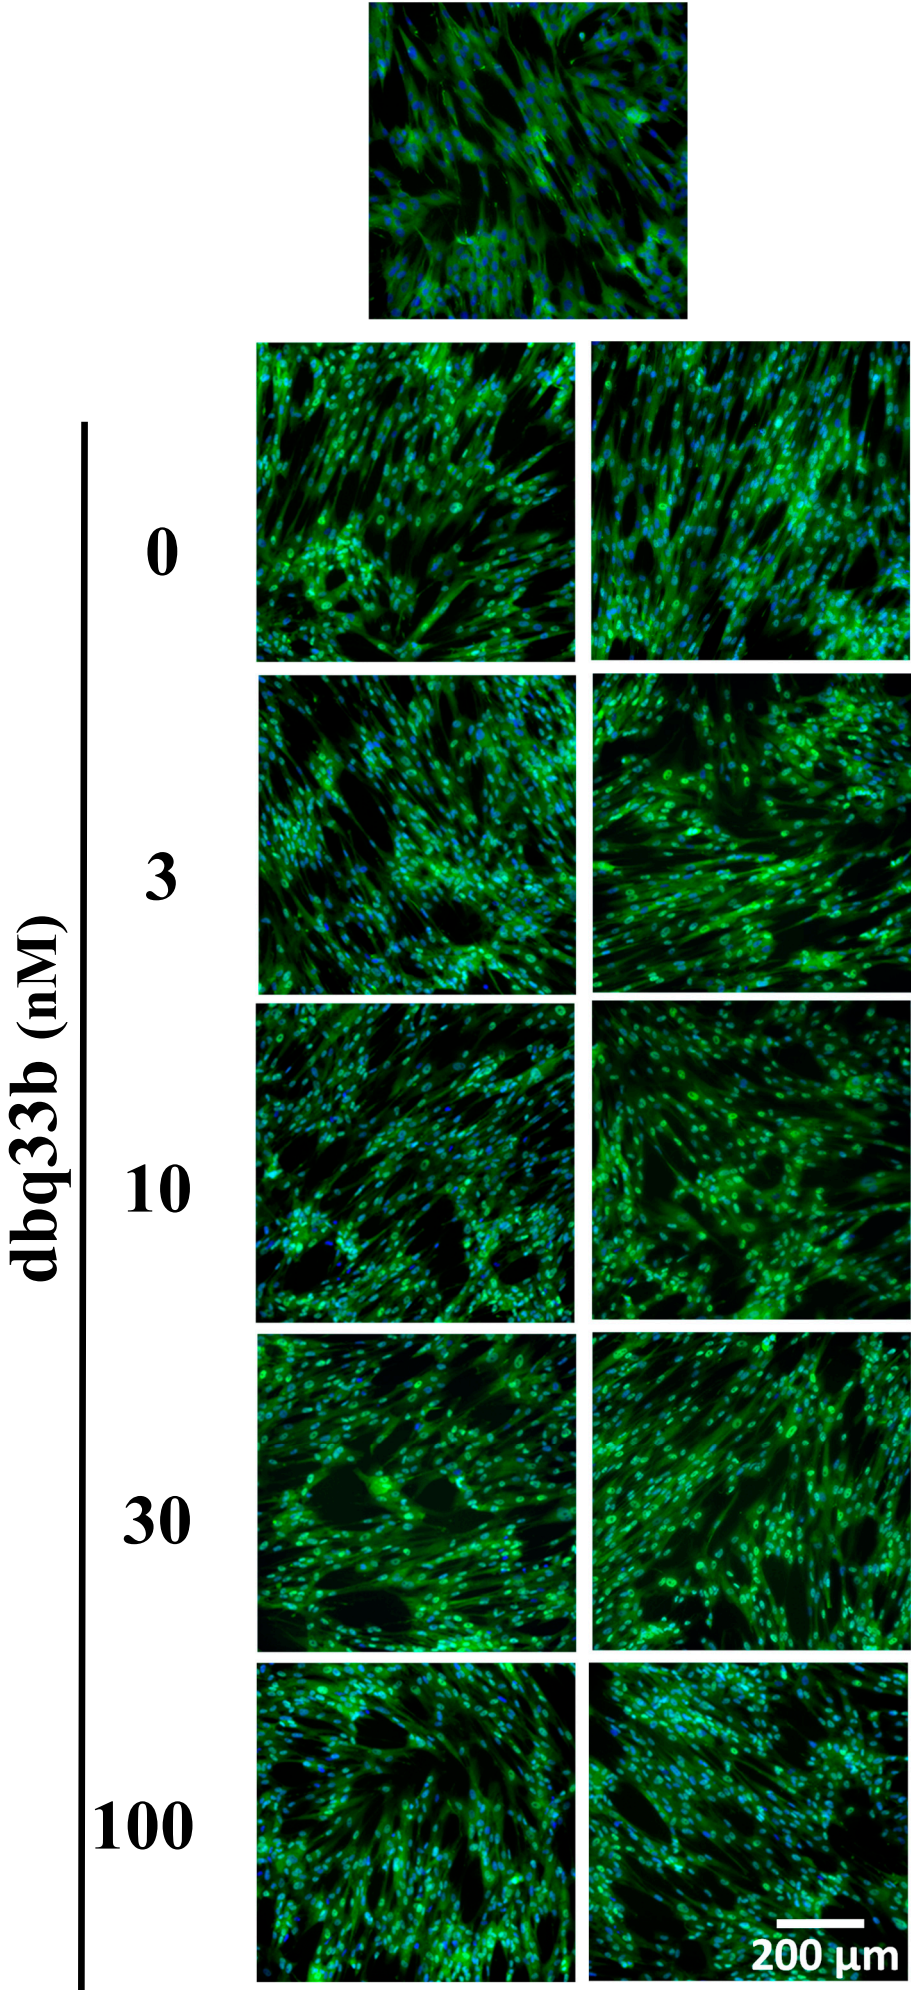



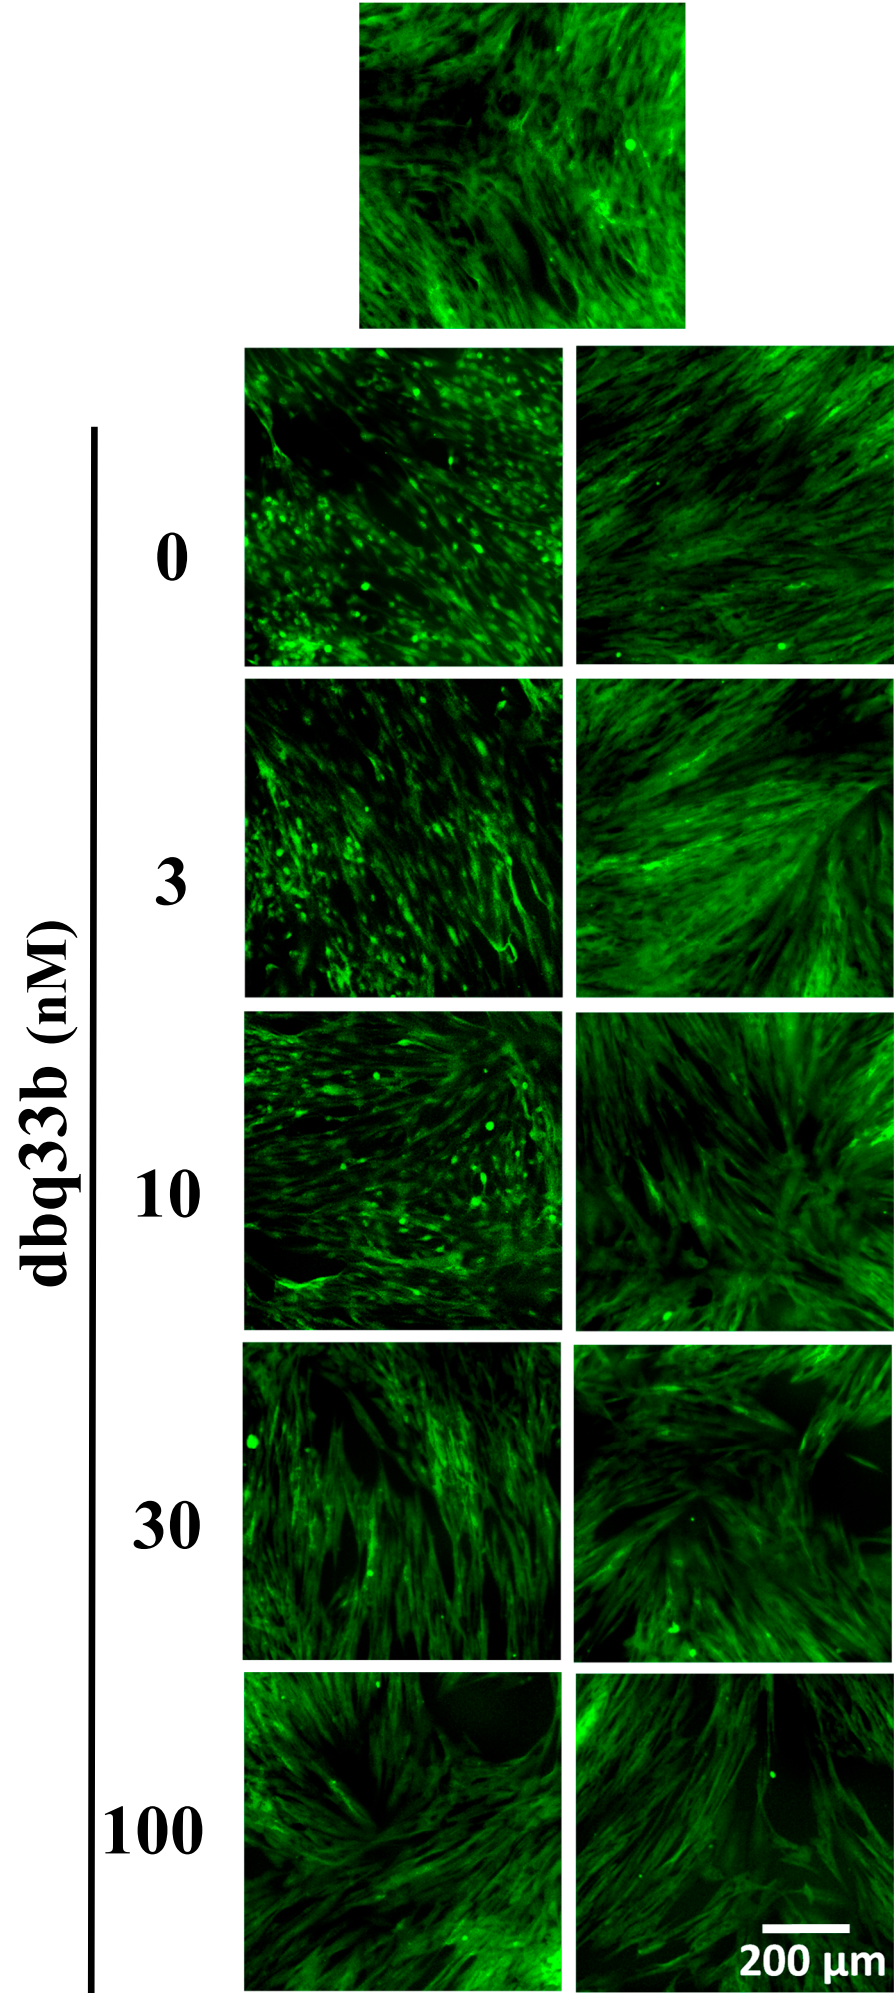

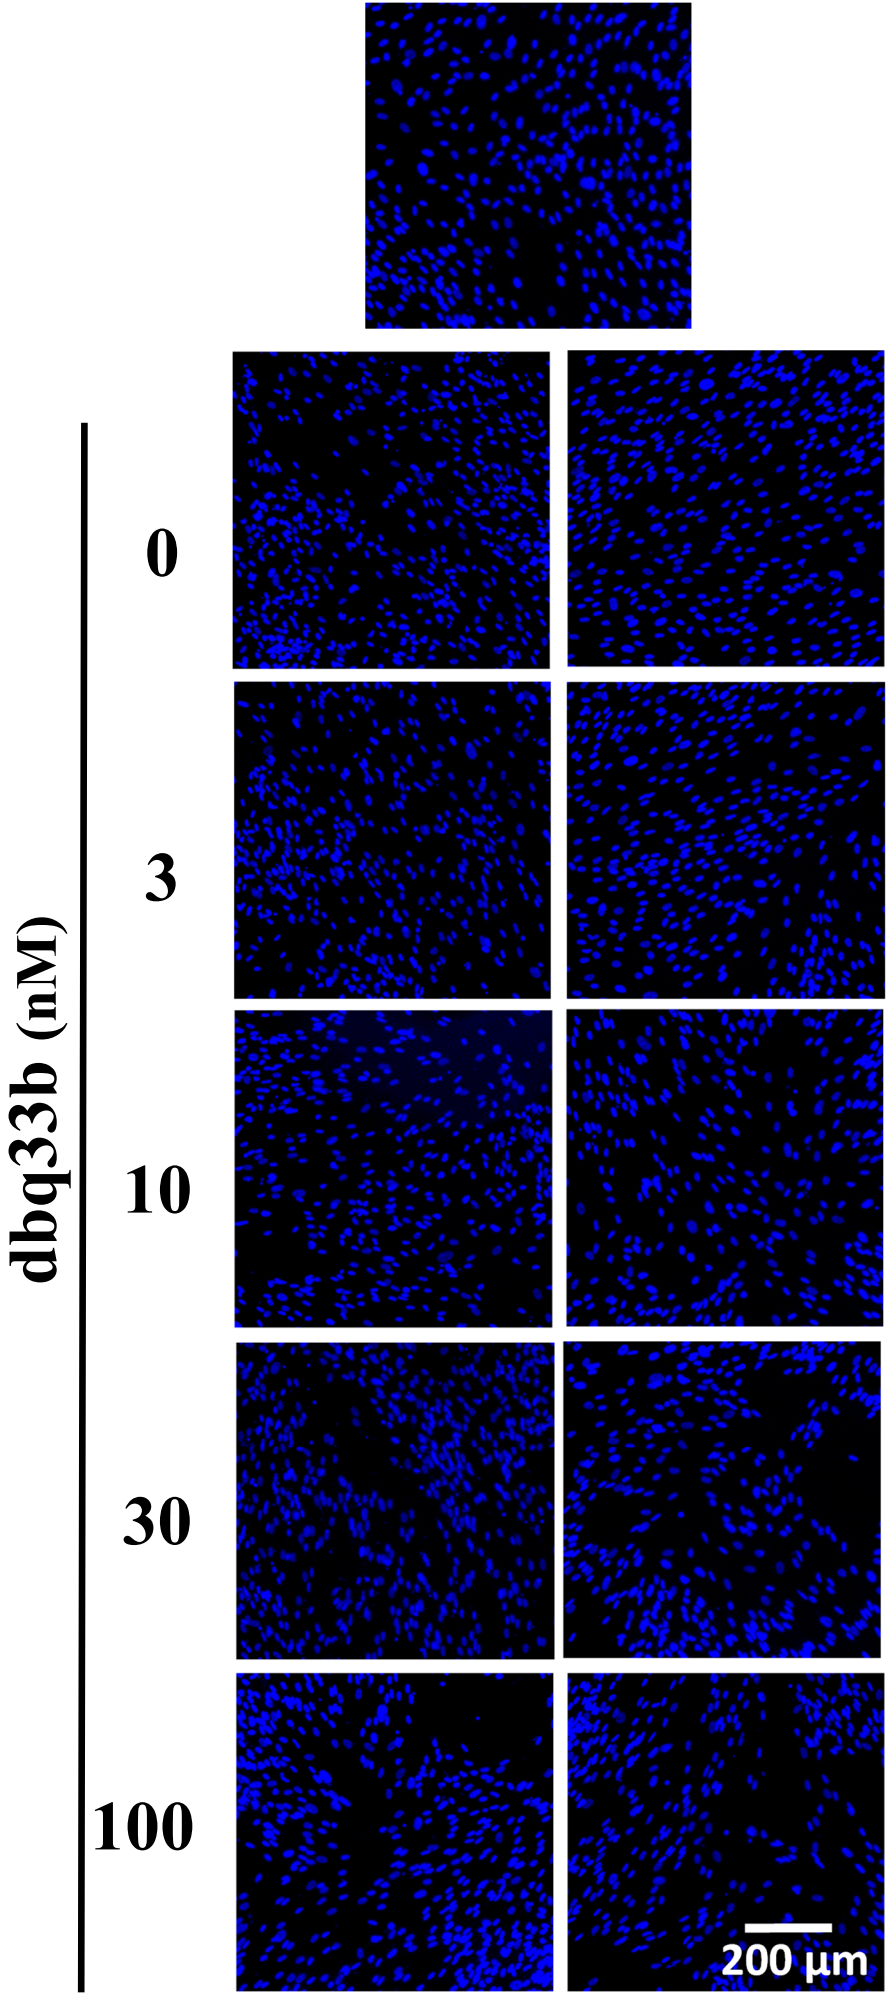

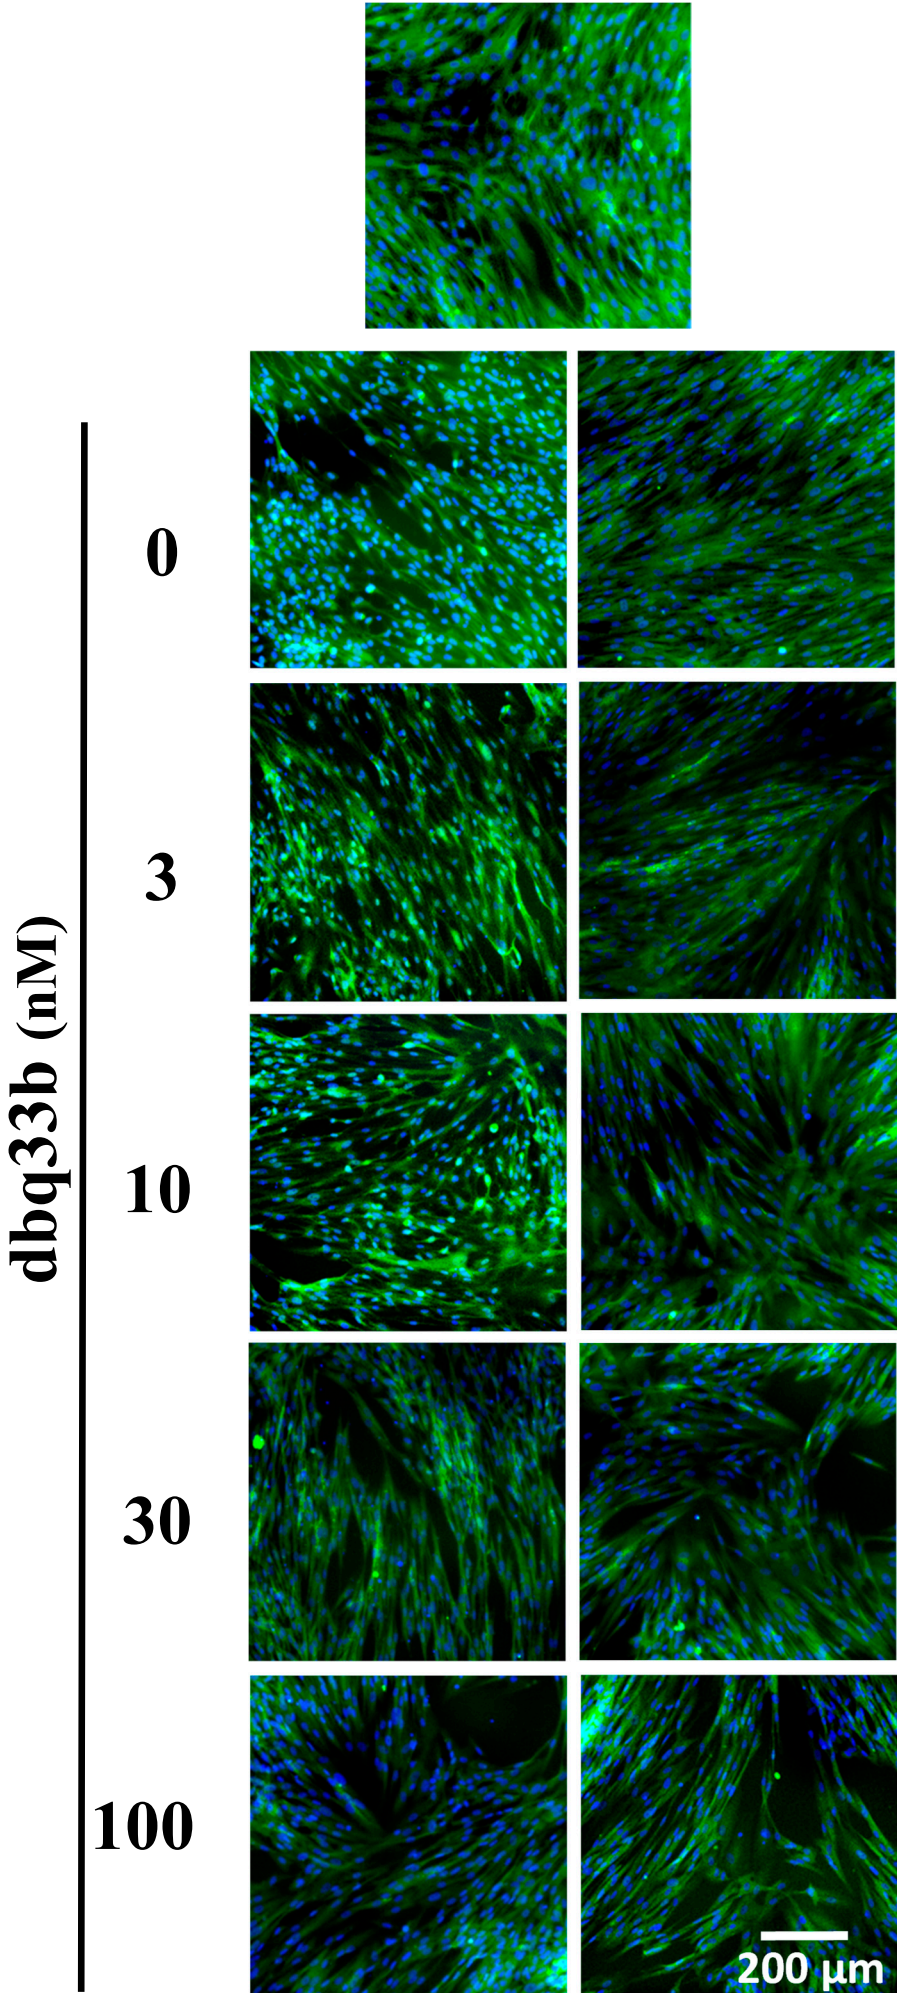

Supplement: s1 [file s1]
